# Supplementary material for: Subsurface and solid solution-type defect engineering in the CoCr2O4–Bi2WO4–NiS2 nanocomposite for the visible-light degradation of doxycycline and removal of chromium and its genotoxic evaluation in Allium cepa
Source: Royal Society of Chemistry journal article supplement (doi:10.1039/d2nj01569b), 2022-01-01
Supplement: d2nj01569b1.pdf [file d2nj01569b1.pdf]

**Subsurface and solid solution-type defect engineering in the  $\text{CoCr}_2\text{O}_4\text{-Bi}_2\text{WO}_4\text{-NiS}_2$  nanocomposite for the visible light degradation of doxycycline and removal of chromium and its genotoxic evaluation in *Allium cepa***

S. Balasurya<sup>a</sup>, Mohammad K. Okla<sup>b</sup>, Saud S. Al-amri<sup>b</sup>, Ibrahim A. Alaraidh<sup>b</sup>, Abdullah A. Alghamdi<sup>b</sup>, Walid Soufan<sup>c</sup>, Mostafa A. Abdel-Maksoud<sup>b,\*\*</sup>, Ramadan F abdelaziz<sup>d</sup>, Christian R. Studenik<sup>d</sup>, S. Sudheer Khan<sup>e,\*</sup>

<sup>a</sup>Nanobiotechnology Laboratory, Department of Biotechnology, Bannari Amman Institute of Technology, Sathyamangalam, Tamil Nadu, India.

<sup>b</sup>Botany and Microbiology Department, College of Science, King Saud University, P.O. Box 2455, Riyadh 11451, Saudi Arabia

<sup>c</sup>Plant Production Department, College of Food and Agriculture Sciences, King Saud University, P.O. Box 2460, Riyadh 11451, Saudi Arabia.

<sup>d</sup>Department of Pharmaceutical Sciences, Division of pharmacology and Toxicology, University of Vienna, Austria.

<sup>e</sup>Department of Oral Medicine and Radiology, Saveetha Dental College and Hospitals, Saveetha Institute of Medical and Technical Sciences (SIMATS), Chennai- 600077, Tamil Nadu, India.

\*Corresponding author

Dr. S. Sudheer Khan

Email: [sudheerkhans.sdc@saveetha.com](mailto:sudheerkhans.sdc@saveetha.com)

\*\*Co-corresponding author

Dr. Mostafa A. Abdel-Maksoud

Email: [harrany@gmail.com](mailto:harrany@gmail.com)

## **Text S1. Characterization**

The formation heterogeneous structure of  $\text{CoCr}_2\text{O}_4\text{-Bi}_2\text{WO}_4\text{-NiS}_2$  NC was confirmed by XRD pattern, which determines the purity and crystalline nature of the prepared particle (Bruker D8 Advance, Germany). The morphology structure of the  $\text{CoCr}_2\text{O}_4\text{-Bi}_2\text{WO}_4\text{-NiS}_2$  NC was determined by transmission electron microscopy (TEM, Carl-Zeiss, Germany). The morphology structure of the  $\text{CoCr}_2\text{O}_4\text{-Bi}_2\text{WO}_4\text{-NiS}_2$  NC was determined by transmission electron microscopy by field emission scanning electron microscopy (FESEM, JEOL, Japan). The elemental analysis of the prepared particle was determined by FE-SEM coupled with Energy-dispersive X-ray spectroscopy (EDS). Fourier-transform infrared spectroscopy (FTIR) data was used to determine the vibrational stretching present in the synthesized particle. S. Brunauer, P. Emmett, and E. Teller (BET) surface area analyzer (Thermo Fisher Scientific Nicolet IS50) was used to determine the surface area and porous nature of the materials. UV-visible diffusion reflection spectroscopy (DRS) of the  $\text{CoCr}_2\text{O}_4\text{-Bi}_2\text{WO}_4\text{-NiS}_2$  was used to determine the reflection spectra of the prepared particle (Perkin-Elmer Lambda 750). The effective charge separation of the nanomaterial was characterized by photoluminescence spectroscopy (PL) and electrochemical impedance spectroscopy (EIS). The X-ray photoelectron spectroscopy was analyzed by using Physical Electronics (PHI Versa Probe III) to determine the chemical composition and to confirm the formation of  $\text{CoCr}_2\text{O}_4\text{-Bi}_2\text{WO}_4\text{-NiS}_2$  NC.

Fig. S1. (a) UV- visible diffusion reflectance spectra, (b) EIS and (c) BET isotherm of  $\text{CoCr}_2\text{O}_4$ ,  $\text{Bi}_2\text{WO}_6$ ,  $\text{NiS}_2$  and  $\text{CoCr}_2\text{O}_4\text{-Bi}_2\text{WO}_6\text{-NiS}_2$  NC.

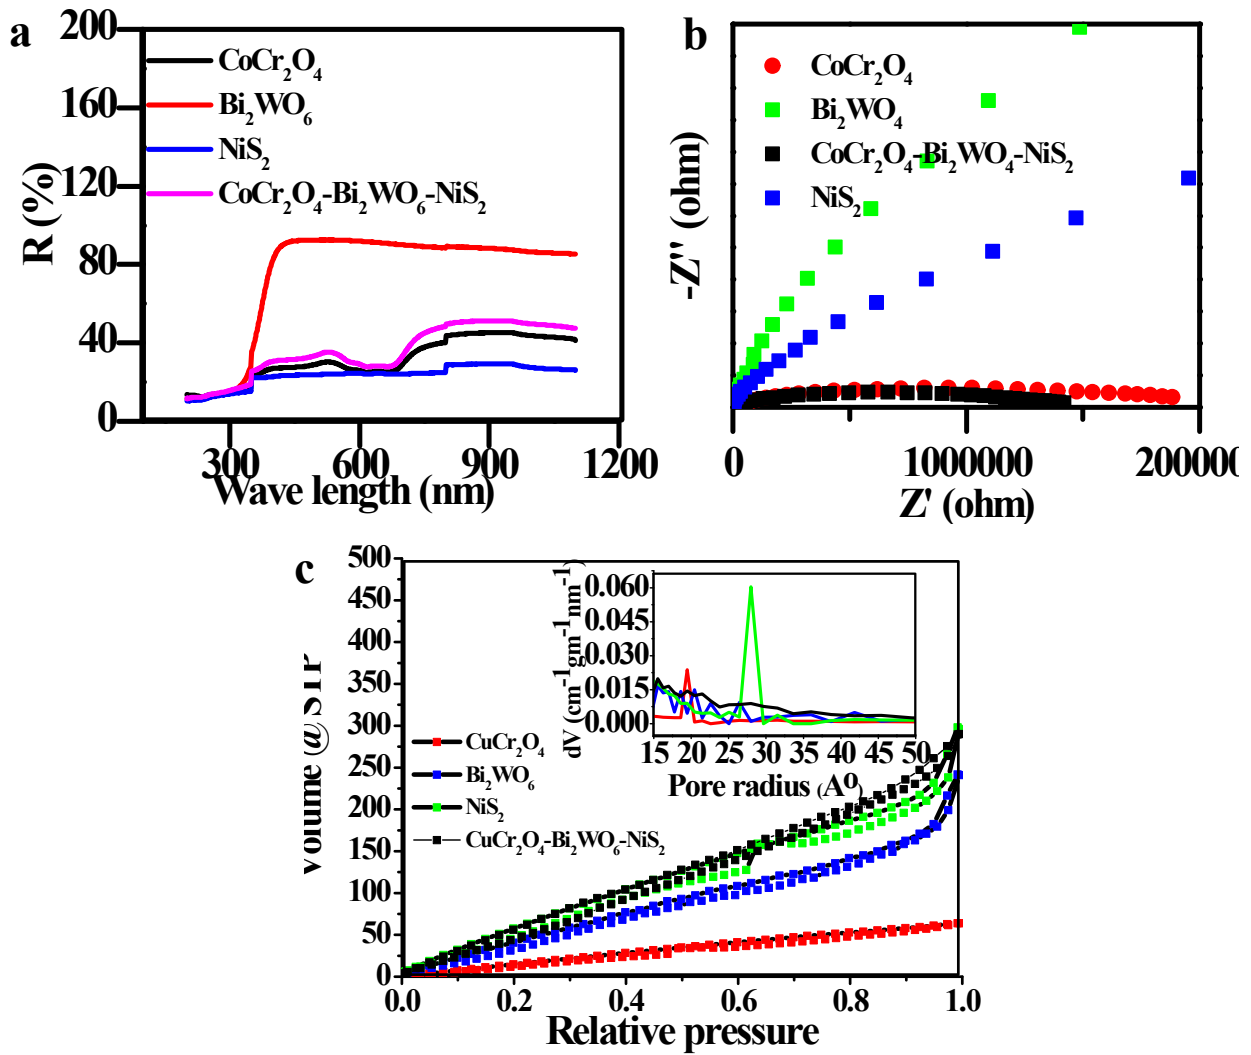

Fig. S2. Plot of  $C/C_0$  and  $\ln(C/C_0)$  vs time at (a1 & a2) different pH, (b1 & b2) at different concentration of NCs and (c1 & c2) at different concentration of doxycycline (doxy).

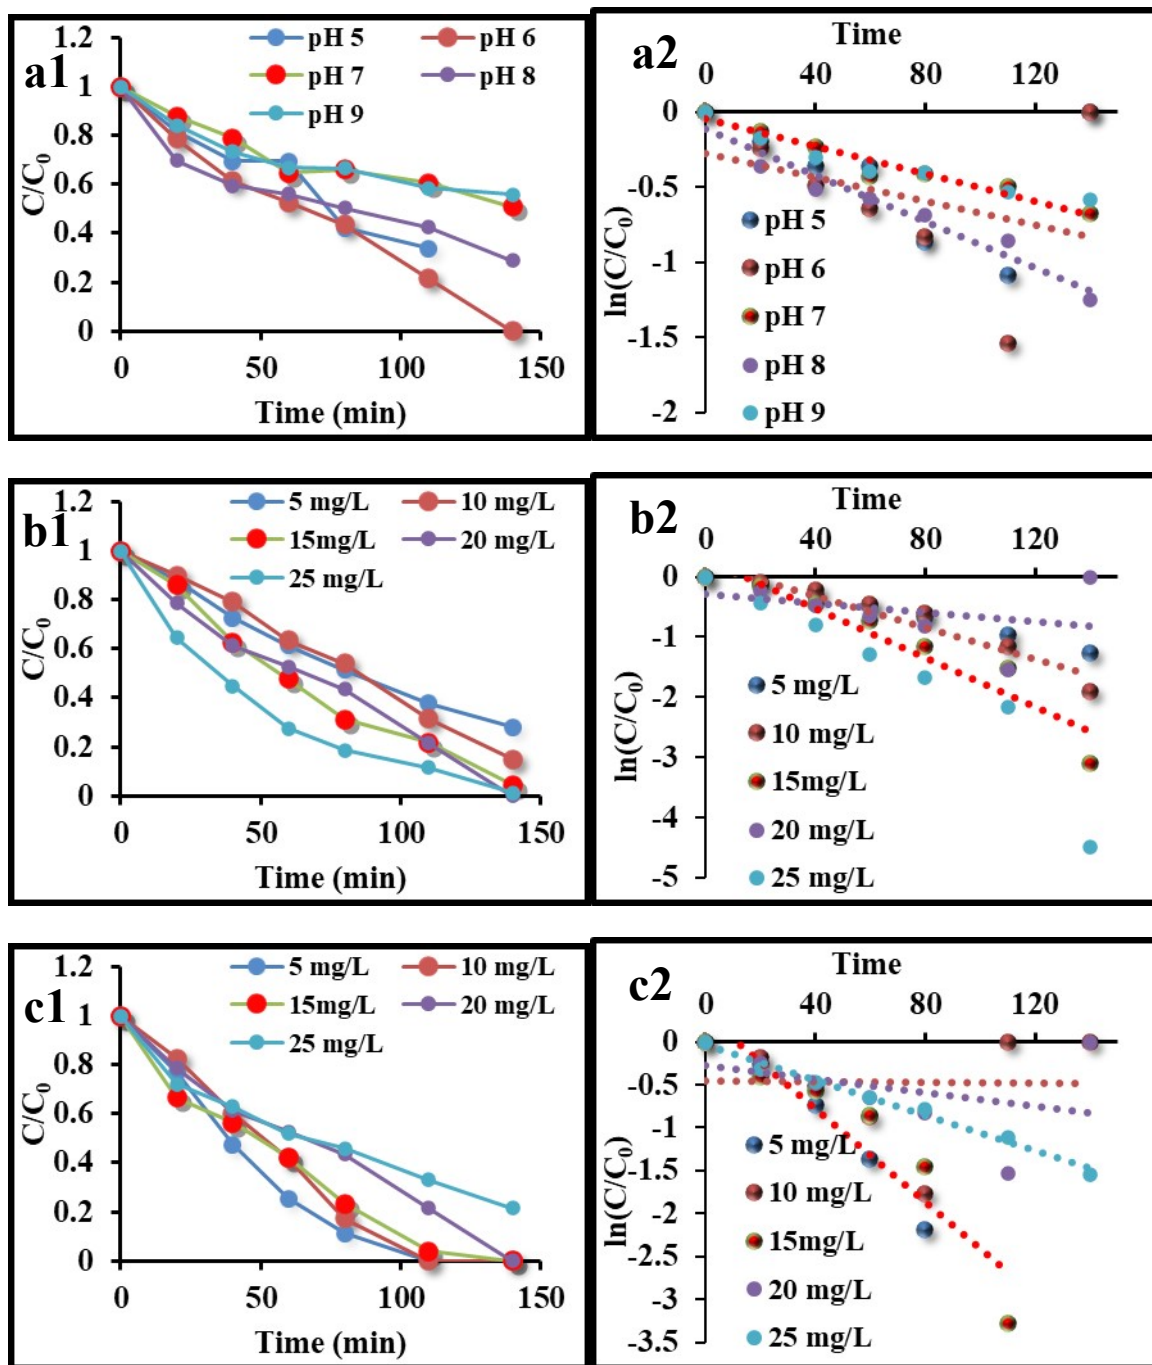

Fig. S3. Plot of  $C/C_0$  and  $\ln(C/C_0)$  vs time (a1 & a2) at different pH, (b1 & b2) at different concentration of NCs and (c1&c2) at different concentration of Cr(VI).

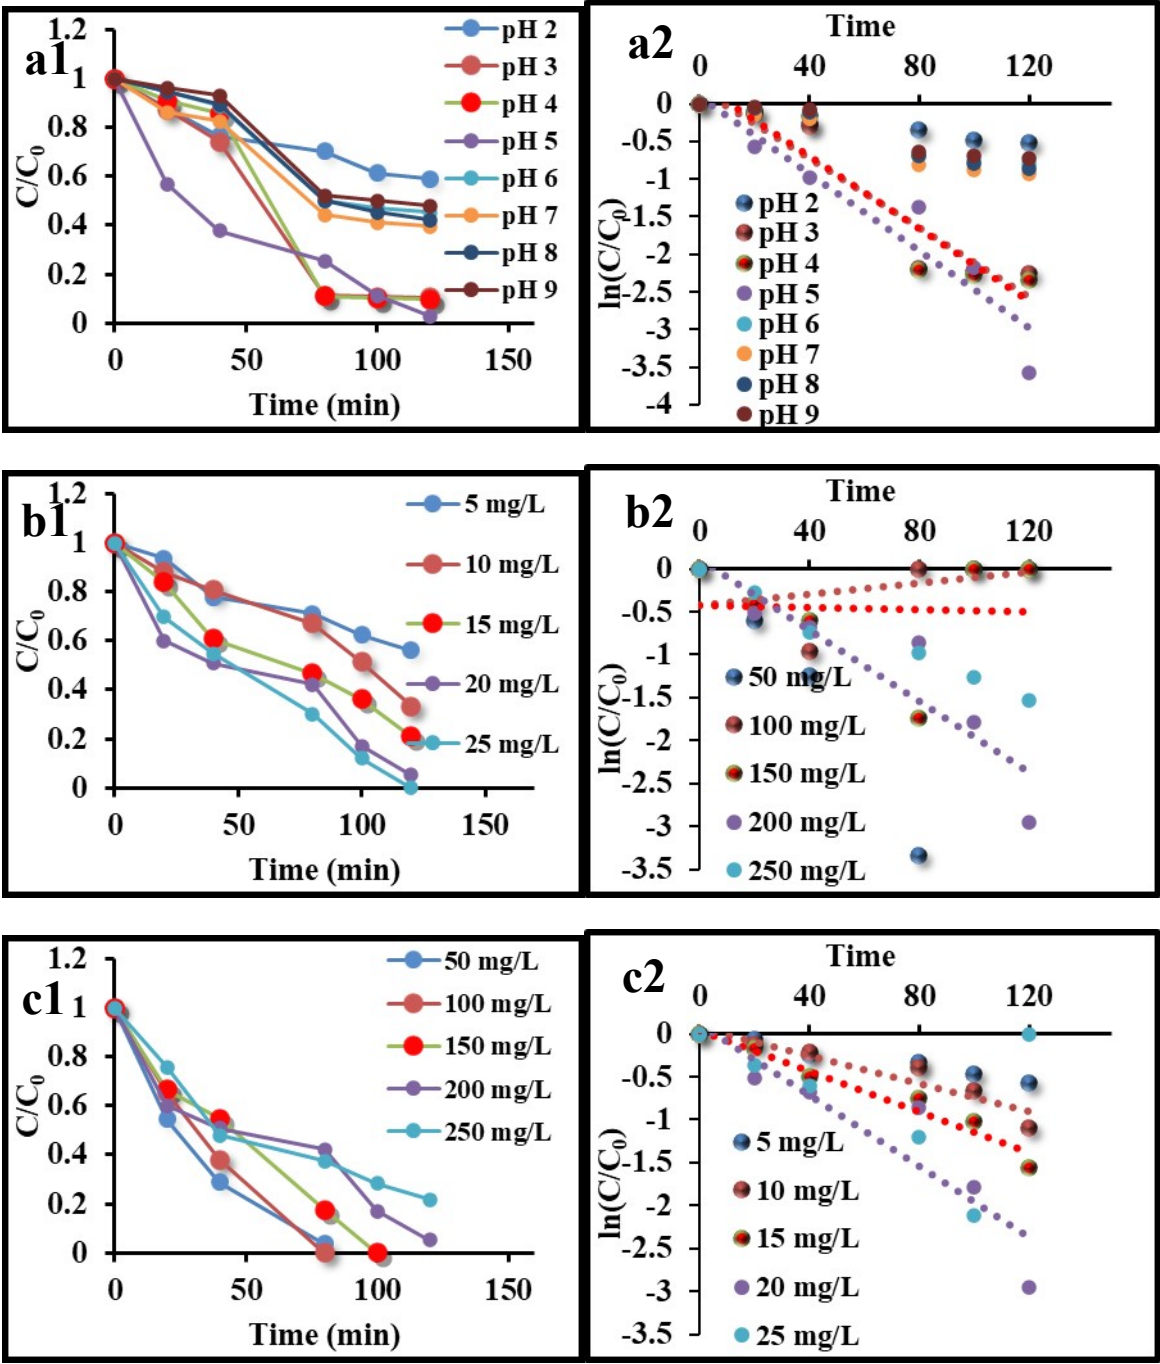

Fig. S4. Reusability on the photocatalytic degradation of doxy (a1) and photocatalytic removal of Cr(VI) (a2), scavenging on the photocatalytic degradation of doxy (b1) and photocatalytic removal of Cr(VI) (b2), (c) ESR of NC and XRD of NC before and after degradation.

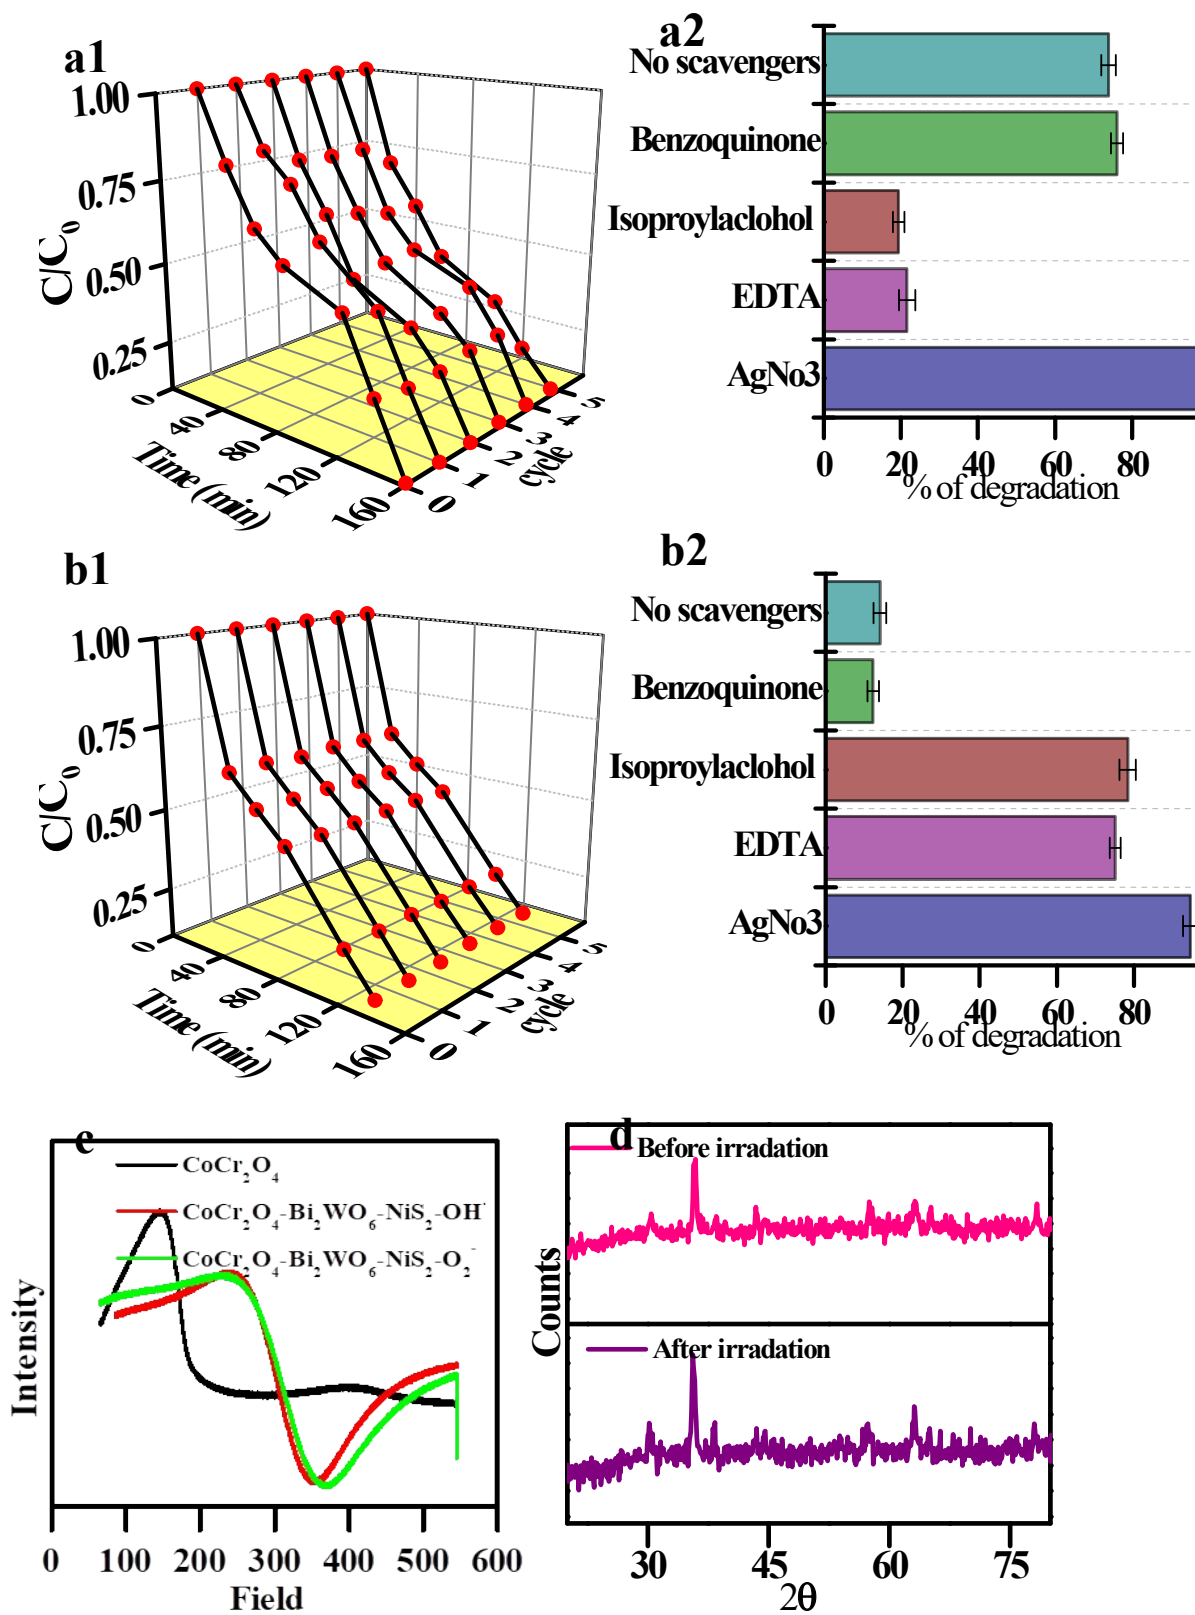

Fig.

Fig. S5. Electronic band structure and DOS of (a)  $\text{CoCr}_2\text{O}_4$ , (b)  $\text{Bi}_2\text{WO}_6$  and (c)  $\text{NiS}_2$  NPs.

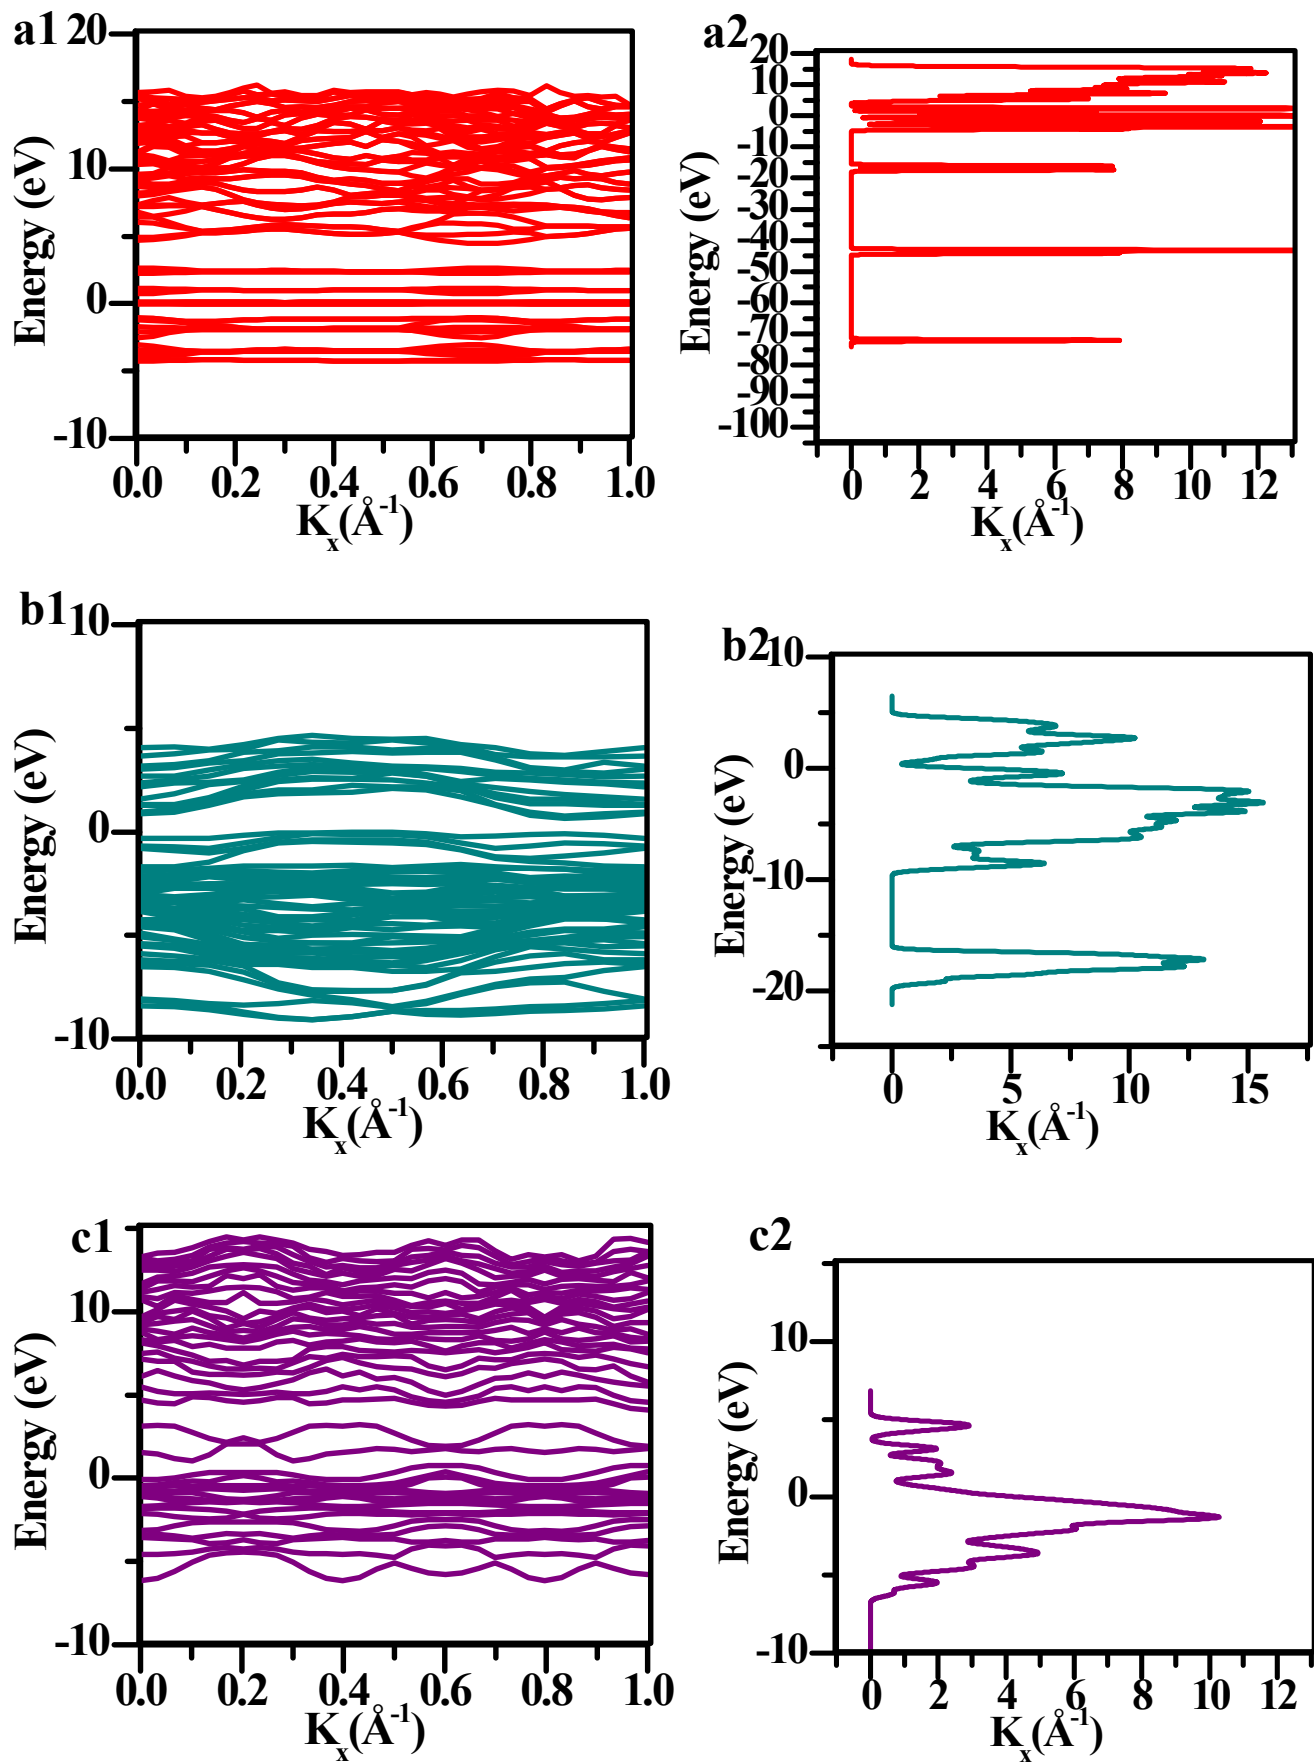

**Table S1.** BET surface areas, pore volume and pore size values of the prepared samples.

| <b>Sample</b>                                                                       | <b>Specific surface area (m<sup>2</sup>/g)</b> | <b>Average pore diameter (nm)</b> | <b>Pore volume (cm<sup>3</sup>/g)</b> |
|-------------------------------------------------------------------------------------|------------------------------------------------|-----------------------------------|---------------------------------------|
| CoCr <sub>2</sub> O <sub>4</sub>                                                    | 61.3                                           | 3.8                               | 0.095                                 |
| Bi <sub>2</sub> WO <sub>6</sub>                                                     | 162.8                                          | 3.2                               | 0.335                                 |
| NiS <sub>2</sub>                                                                    | 215.9                                          | 2.7                               | 0.439                                 |
| CoCr <sub>2</sub> O <sub>4</sub> -Bi <sub>2</sub> WO <sub>6</sub> -NiS <sub>2</sub> | 246.7                                          | 3.2                               | 0.43                                  |



**Table S2.** Fukui function of Doxycycline

|     | <b>F(0)</b> | <b>F(+)</b> | <b>F(-)</b> |
|-----|-------------|-------------|-------------|
| O1  | 0.014       | 0.014       | 0.014       |
| O2  | 0.012       | 0.028       | -0.003      |
| O3  | 0.033       | 0.062       | 0.005       |
| O4  | 0.017       | 0.012       | 0.021       |
| O5  | 0.041       | 0.065       | 0.018       |
| O6  | 0.034       | 0.026       | 0.041       |
| O7  | 0.02        | 0.03        | 0.01        |
| O8  | 0.027       | 0.027       | 0.026       |
| N1  | 0.102       | -0.002      | 0.205       |
| N2  | 0.017       | 0.01        | 0.023       |
| C1  | 0           | 0           | 0.001       |
| C2  | 0.003       | 0.003       | 0.002       |
| C3  | 0.002       | 0.001       | 0.003       |
| C4  | 0.002       | 0.008       | -0.003      |
| C5  | 0.01        | 0.002       | 0.018       |
| C6  | 0.002       | 0.003       | 0.001       |
| C7  | 0.014       | 0.027       | 0.001       |
| C8  | 0.033       | 0.074       | -0.009      |
| C9  | 0.002       | -0.003      | 0.006       |
| C10 | 0.014       | 0.03        | -0.002      |
| C11 | 0.001       | 0.005       | -0.002      |
| C12 | 0.043       | 0.076       | 0.01        |
| C13 | 0.011       | 0.02        | 0.002       |
| C14 | 0.008       | 0.016       | 0           |
| C15 | 0.006       | 0.009       | 0.004       |
| C16 | 0.017       | 0.029       | 0.006       |
| C17 | 0.022       | 0.003       | 0.041       |
| C18 | 0.023       | 0.005       | 0.041       |
| C19 | 0.02        | 0.032       | 0.008       |
| C20 | 0.006       | 0.006       | 0.006       |
| C21 | 0.038       | 0.062       | 0.015       |
| C22 | 0.022       | 0.033       | 0.012       |
| H1  | 0.006       | 0.006       | 0.006       |
| H2  | 0.008       | 0.014       | 0.002       |
| H3  | 0.004       | 0.002       | 0.007       |
| H4  | 0.031       | 0.009       | 0.052       |
| H5  | 0.008       | 0.013       | 0.003       |

|     |       |       |       |
|-----|-------|-------|-------|
| H6  | 0.005 | 0.005 | 0.005 |
| H7  | 0.009 | 0.017 | 0.002 |
| H8  | 0.011 | 0.013 | 0.009 |
| H9  | 0.008 | 0.011 | 0.006 |
| H10 | 0.012 | 0.012 | 0.013 |
| H11 | 0.014 | 0.023 | 0.005 |
| H12 | 0.019 | 0     | 0.038 |
| H13 | 0.043 | 0.009 | 0.078 |
| H14 | 0.023 | 0.011 | 0.035 |
| H15 | 0.044 | 0.01  | 0.077 |
| H16 | 0.017 | 0.002 | 0.031 |
| H17 | 0.024 | 0.01  | 0.038 |
| H18 | 0.008 | 0.008 | 0.008 |
| H19 | 0.011 | 0.017 | 0.005 |
| H20 | 0.022 | 0.033 | 0.011 |
| H21 | 0.018 | 0.025 | 0.01  |
| H22 | 0.007 | 0.003 | 0.011 |
| H23 | 0.016 | 0.014 | 0.019 |
| H24 | 0.015 | 0.022 | 0.009 |

**Table S3.** The occurrence of cytological defects in root cells per 1000 cells after treatment of *A. cepa* with different concentrations of CoCr<sub>2</sub>O<sub>4</sub>/Bi<sub>2</sub>WO<sub>6</sub>/NiS<sub>2</sub> nanocomposite.

| Treatments      | Sample size n=5 | MI <sup>a</sup> (%) | P <sup>b</sup> (%) | M <sup>c</sup> (%) | A <sup>d</sup> (%) | T <sup>e</sup> (%) | Mean MI (%) ± SE |
|-----------------|-----------------|---------------------|--------------------|--------------------|--------------------|--------------------|------------------|
| <b>0 µg/mL</b>  | Sample 1        | 99.6                | 98.4               | 0.8                | 0                  | 0.8                | 98.9±0.71        |
|                 | Sample 2        | 98.7                | 98.6               | 0.4                | 0.4                | 0.6                |                  |
|                 | Sample 3        | 97.8                | 98.4               | 0.6                | 0.2                | 0.8                |                  |
|                 | Sample 4        | 99.4                | 97.9               | 0.3                | 0.7                | 1.1                |                  |
|                 | Sample 5        | 99.1                | 98.2               | 1.1                | 0.3                | 0.4                |                  |
| <b>10 µg/mL</b> | Sample 1        | 99.2                | 97.7               | 0.9                | 0.8                | 0.6                | 98.47±0.83       |
|                 | Sample 2        | 99.1                | 98.3               | 0.6                | 0.7                | 0.4                |                  |
|                 | Sample 3        | 98.9                | 97.9               | 0.4                | 0.6                | 1.1                |                  |
|                 | Sample 4        | 97.9                | 97.2               | 1.2                | 0.9                | 0.7                |                  |
|                 | Sample 5        | 97.3                | 96.9               | 1.3                | 0.9                | 0.9                |                  |
| <b>20 µg/mL</b> | Sample 1        | 98.2                | 97.2               | 0.8                | 0.6                | 1.4                | 97.17±0.59       |
|                 | Sample 2        | 96.9                | 98.4               | 0.1                | 1.4                | 0.1                |                  |
|                 | Sample 3        | 97.2                | 97.2               | 0.9                | 0.8                | 1.1                |                  |
|                 | Sample 4        | 96.7                | 96.9               | 0.8                | 0.7                | 1.6                |                  |
|                 | Sample 5        | 96.9                | 97.2               | 1.1                | 0.6                | 1.1                |                  |
| <b>30 µg/mL</b> | Sample 1        | 97.1                | 96.8               | 1.4                | 0.4                | 1.4                | 95.39±1.23       |
|                 | Sample 2        | 96.2                | 96.3               | 1.1                | 0.9                | 1.6                |                  |
|                 | Sample 3        | 94.1                | 95.8               | 0.9                | 1.4                | 0.9                |                  |
|                 | Sample 4        | 95.1                | 96.2               | 0.1                | 0.7                | 1.1                |                  |
|                 | Sample 5        | 94.5                | 95.2               | 0.8                | 0.9                | 0.4                |                  |
| <b>40 µg/mL</b> | Sample 1        | 89.6                | 96.4               | 0.8                | 0.2                | 0.4                | 87.75±3.08       |
|                 | Sample 2        | 92.1                | 94.6               | 0.6                | 0.9                | 0.7                |                  |
|                 | Sample 3        | 86.2                | 95.3               | 1.2                | 0.2                | 0.7                |                  |
|                 | Sample 4        | 84.2                | 96.1               | 0.6                | 0.8                | 1.4                |                  |
|                 | Sample 5        | 86.9                | 91.9               | 0.4                | 0.8                | 1.1                |                  |
| <b>50 µg/mL</b> | Sample 1        | 80.4                | 92.1               | 0.9                | 0.8                | 1.1                | 78.14±2.77       |
|                 | Sample 2        | 81.6                | 93.4               | 0.8                | 0.6                | 0.8                |                  |
|                 | Sample 3        | 74.9                | 92.6               | 1.4                | 0.2                | 0.9                |                  |
|                 | Sample 4        | 76.4                | 96.7               | 1.2                | 0.4                | 1.1                |                  |
|                 | Sample 5        | 77.6                | 93.4               | 0.6                | 0.4                | 1.1                |                  |

<sup>a</sup>Mitotic index, <sup>b</sup>Prophase, <sup>c</sup>Metaphase, <sup>d</sup>Anaphase, <sup>e</sup>Telophase

**Table S4.** Chromosomal aberrations and micro nuclei of root cells of *A. cepa* treated with different concentration of CoCr<sub>2</sub>O<sub>4</sub>/Bi<sub>2</sub>WO<sub>6</sub>/NiS<sub>2</sub> nanocomposite.

| Concentration of ZnO NPs (µg/mL) | Sample size n-5 | Chromosomal aberration |                      |                     |                      | Chromosomal aberration index (%) | Chromosomal aberration |                      |                     |                      | Micronuclei index(%) |
|----------------------------------|-----------------|------------------------|----------------------|---------------------|----------------------|----------------------------------|------------------------|----------------------|---------------------|----------------------|----------------------|
|                                  |                 | Defects in prophase    | Defects in metaphase | Defects in anaphase | Defects in telophase |                                  | Defects in prophase    | Defects in metaphase | Defects in anaphase | Defects in telophase |                      |
| 0                                | S1              | -                      | -                    | -                   | -                    | Nil                              | -                      | -                    | -                   | -                    | Nil                  |
|                                  | S2              | -                      | -                    | -                   | -                    |                                  | -                      | -                    | -                   | -                    |                      |
|                                  | S3              | -                      | -                    | -                   | -                    |                                  | -                      | -                    | -                   | -                    |                      |
|                                  | S4              | -                      | -                    | -                   | -                    |                                  | -                      | -                    | -                   | -                    |                      |
|                                  | S5              | -                      | -                    | -                   | -                    |                                  | -                      | -                    | -                   | -                    |                      |
| 10                               | S1              | -                      | -                    | -                   | -                    | Nil                              | -                      | -                    | -                   | -                    | Nil                  |
|                                  | S2              | -                      | -                    | -                   | -                    |                                  | -                      | -                    | -                   | -                    |                      |
|                                  | S3              | -                      | -                    | -                   | -                    |                                  | -                      | -                    | -                   | -                    |                      |
|                                  | S4              | -                      | -                    | -                   | -                    |                                  | -                      | -                    | -                   | -                    |                      |
|                                  | S5              | -                      | -                    | -                   | -                    |                                  | -                      | -                    | -                   | -                    |                      |
| 20                               | S1              | -                      | -                    | -                   | -                    | Nil                              | -                      | -                    | -                   | -                    | Nil                  |
|                                  | S2              | -                      | -                    | -                   | -                    |                                  | -                      | -                    | -                   | -                    |                      |
|                                  | S3              | -                      | -                    | -                   | -                    |                                  | -                      | -                    | -                   | -                    |                      |
|                                  | S4              | -                      | -                    | -                   | -                    |                                  | -                      | -                    | -                   | -                    |                      |
|                                  | S5              | -                      | -                    | -                   | -                    |                                  | -                      | -                    | -                   | -                    |                      |
| 30                               | S1              | -                      | -                    | -                   | -                    | 0.9 ± 0.3                        | -                      | -                    | -                   | -                    | Nil                  |
|                                  | S2              | -                      | +                    | -                   | -                    |                                  | -                      | -                    | -                   | -                    |                      |
|                                  | S3              | +                      | -                    | -                   | -                    |                                  | -                      | -                    | -                   | -                    |                      |
|                                  | S4              | -                      | -                    | -                   | -                    |                                  | -                      | -                    | -                   | -                    |                      |
|                                  | S5              | -                      | -                    | +                   | -                    |                                  | -                      | -                    | -                   | -                    |                      |
| 40                               | S1              | -                      | -                    | -                   | -                    | 1.4 ± 0.8                        | -                      | -                    | -                   | -                    | Nil                  |
|                                  | S2              | -                      | -                    | -                   | +                    |                                  | -                      | -                    | -                   | -                    |                      |
|                                  | S3              | -                      | -                    | -                   | -                    |                                  | -                      | -                    | -                   | -                    |                      |
|                                  | S4              | -                      | -                    | +                   | -                    |                                  | -                      | -                    | -                   | -                    |                      |
|                                  | S5              | -                      | -                    | -                   | -                    |                                  | -                      | -                    | -                   | -                    |                      |
| 50                               | S1              | -                      | -                    | -                   | -                    | 2.1 ± 0.6                        | -                      | -                    | -                   | -                    | Nil                  |
|                                  | S2              | +                      | -                    | -                   | -                    |                                  | -                      | -                    | -                   | -                    |                      |
|                                  | S3              | -                      | -                    | +                   | -                    |                                  | -                      | -                    | -                   | -                    |                      |
|                                  | S4              | -                      | +                    | -                   | +                    |                                  | -                      | -                    | -                   | -                    |                      |
|                                  | S5              | -                      | -                    | +                   | -                    |                                  | -                      | -                    | -                   | -                    |                      |
